1       **Effects of Standing on Spinal Alignment and Lumbar Intervertebral Discs in Young, Healthy**  
2                                   **Individuals Determined by Positional Magnetic Resonance Imaging**

3  
4

5                   Christian I. Weber<sup>1</sup>, Ching-Ting Hwang<sup>2</sup>, Linda R. Van Dillen<sup>2,3,4</sup>, Simon Y. Tang<sup>1,4</sup>

6                   <sup>1</sup>Biomedical Engineering; <sup>2</sup>Movement Science Program; <sup>3</sup>Physical Therapy; <sup>4</sup>Orthopaedic Surgery

7                                   Washington University in St. Louis, St. Louis, MO

8   Running head: Effects of Standing on Spinal Alignment and Lumbar IVDs

9

10   Corresponding author:  
11   Simon Y. Tang, Ph.D.  
12   660 South Euclid Ave, Box 8233  
13   St. Louis, MO 63110  
14   (314) 286-2664  
15   simon.tang@wustl.edu

16

17   Keywords: Intervertebral disc, spine, pMRI, standing, back-healthy

18

19

20

21

22

23 **Abstract**

24 Traditional diagnostic imaging of the spine is performed in supine, a relatively unloaded position.  
25 However, the spine is subjected to complex loading environments in daily activities such as standing.  
26 Therefore, we seek to quantify the changes from supine to standing in the spines of young, healthy  
27 individuals in standing using a positional MRI system. This is an observational study that examined the  
28 changes in the spine and individual intervertebral discs (IVDs) during supine and standing of forty healthy  
29 participants (19 males / 21 females) without a history of low back pain. The regional lumbar spinal  
30 alignment was measured by the sagittal Cobb angle. Segmental IVD measurements included the segmental  
31 Cobb angle, anterior to posterior height (A/P) ratio, and IVD width measured at each L1/L2 - L5/S1 levels.  
32 The intra-observer intra-class correlation (ICC) consistency model showed values for measurements ranged  
33 from 0.76-0.98. The inter-observer ICC values ranged from 0.68-0.99. The Cobb angle decreased in  
34 standing. The L5/S1 segmental Cobb angle decreased in standing. The L2/L3 and L3/L4 A/P ratios  
35 increased and the L5/S1 A/P ratio decreased in standing. No differences in IVD width were observed from  
36 supine to standing. This study examined the regional lumbar spinal alignment and segmental IVD changes  
37 from supine to standing in young, healthy individuals without LBP using pMRI. In developing and  
38 validating these measurements, we have also established the normative data for healthy, asymptomatic  
39 population that could be useful for other investigations examining how individuals with spinal or IVD  
40 pathologies may adapt between supine and standing.

## 41 **Introduction**

42 The degeneration of the intervertebral disc (IVD) is a significant contributor to low back pain (LBP) (39) .  
43 Despite the association between IVD degeneration and LBP, the correspondence between the clinical  
44 presentation of LBP and IVD imaging findings is quite poor (35). One possibility for this lack of specificity  
45 may be that most diagnostic imaging of the spine is performed in supine, a minimally loaded position (5,  
46 45). An individual in standing generates lumbar intradiscal pressures approximately five times greater  
47 than in supine (31) and complex multiaxial forces (32) that result in different tensile and shear deformations  
48 across the IVD (3, 43). Compressive loading similar to that experienced during standing is critical for  
49 maintaining spinal curvature (44). Thus, examining the spine in standing may be more functionally and  
50 clinically relevant than in supine.

51 Magnetic Resonance Imaging (MRI) is a commonly used radiographic technique for the imaging of  
52 the spine and for the visualization of hydrated tissue structures such as the IVDs. Positional MRI (pMRI)  
53 with an open magnet configuration enables the imaging of the human participants in different positions (4,  
54 18, 19); thus, the pMRI provides the opportunity to observe the spinal structures in loaded positions other  
55 than supine (6, 18, 36, 37). Examining the lumbar spine in an upright position using a pMRI has improved  
56 the specificity in discriminating acute and chronic LBP populations (42) and increased the reliability of  
57 observing stenosis and IVD degeneration (12). Prior studies have utilized pMRI to examine spinal  
58 adaptations between sitting to standing (20), supine to standing in athletes (29) and patients with lumbar  
59 spinal stenosis (27), and changes of the dural sac in the lumbar spine due to posture (16). But none of these  
60 studies explored differences of segmental structural measurements from supine to standing in a young,  
61 healthy population without a history of LBP ('back-healthy'). Back-healthy individuals have been shown  
62 to be susceptible to LBP symptoms in prolonged standing with a high rate of developing chronic LBP (9,  
63 10, 28, 33, 34, 40). Thus examining the standing-induced adaptations in the back-healthy population could  
64 provide predictive information prior to development of spinal pathologies. The pMRI can leveraged to  
65 observe adaptations across positions of the lumbar spine using regional alignment measurements (sagittal  
66 Cobb angle) and segmental lumbar measurements such as segmental Cobb angle, anterior/posterior height

67 (A/P) ratio, and IVD width. Therefore, the objectives of this study are to 1) investigate the effects of  
68 standing on the spinal alignment and individual lumbar IVDs of young, back-healthy human participants  
69 ranging from 18 to 30 years of age using pMRI, and 2) determine whether there are sex-specific differences  
70 in these measurements due to the variations in spinal alignment between males and females (15, 47). We  
71 hypothesized that 1) the sagittal Cobb angle would be significantly different between supine and standing,  
72 2) individual IVDs across the lumbar spine would adapt differentially to standing, and 3) the change in  
73 segmental Cobb angle, A/P ratio, and IVD width at each lumbar level from supine to standing would be  
74 different between males and females.

## 75 **Material and methods**

### 76 *Participants*

77 The study included forty participants (19 male/21 female) between 18-30 years of age and body-mass index  
78 (BMI) < 30kg/m<sup>2</sup> (Table 1). Participants were recruited through posted flyers and distributed emails to the  
79 community and local universities in the St. Louis metropolitan area. Participants were excluded during  
80 screening if they reported any history of LBP. LBP was defined as pain in the lumbar region greater than  
81 2 on a 0-10 verbal numeric rating scale that lasted at least 24 hours that resulted in one or more of the  
82 following: (1) some type of medical intervention (e.g., physician, physical therapist, chiropractor); (2) three  
83 or more consecutive days of missed work or school; (3) three or more consecutive days of altered activities  
84 of daily living. Exclusion criteria also included a prior diagnosis of diabetes, anxiety, depression,  
85 employment in a job that involved standing for greater than 4 hours per day or standing in one place for  
86 more than 1 hour per day during the last 12 months, consumption of caffeinated drinks > 25 per week,  
87 consumption of alcoholic drinks > 10 per week, or smoking cigarettes > 15 per day. All participants read  
88 and signed an informed consent form in accordance with the Human Research Protection Office at  
89 Washington University School of Medicine. The participants were instructed to avoid non-habitual  
90 strenuous physical activity (e.g., running, weight lifting) for 24 hours prior to imaging with no rescheduling  
91 required. All imaging was performed in the afternoon after 12PM to minimize diurnal variations (26).

92

### 93 *Data collection*

94 Images of the lumbar spine (L1-S1) were obtained using the 0.6T Open UPRIGHT® MRI (Fonar, New  
95 York, NY) system. A 3-plane localizer was used to acquire sagittal T2 weighted images (repetition time =  
96 610 ms, echo time = 17 ms, field of view = 24 cm, acquisition matrix = 210 x 210, slice thickness = 3 mm,  
97 no gap, scan duration = 2 min) (37). This sequence was optimized for reducing scan time and motion  
98 artifacts [12-13]. A wood plank was placed adjacent to the quad-planar coil on the MRI table to provide a  
99 continuous flat surface for the lumbar spine (Fig. 1). The participant entered the scanner facing forward  
100 with his/her back against the table. A pillow was placed behind the head to provide support to the neck.

101 The table was adjusted to a horizontal position of 180 degrees. The participant was positioned in supine for  
102 10 minutes prior to the first scan. The MRI table then was moved to a vertical position with a 84 degree  
103 table tilt where participants were then standing. The table tilt of 84 degrees helped to stabilize the  
104 participant and prevent motion artifacts during the imaging in standing (Fig. 1). The pillow was removed,  
105 and a VersaRest™ device, an arm support, was placed in the scanner underneath the wrists 5 cm below the  
106 lateral epicondyle of the elbow (Fig. 1). Participants were told to stand normally without leaning on the  
107 sides of the magnet, back of the scanner or on the VersaRest™ during the scan in standing. A board-  
108 certified MRI technician conducted all imaging. After imaging, all images were exported as DICOM files  
109 to be analyzed on Miele (OsiriX)-LXIV (open source) (38).

110

#### 111 *Regional Lumbar Spine Alignment*

112 The four-line Cobb method, denoted here as the Cobb angle, was used to quantify regional lumbar spine  
113 alignment (14). The Cobb angle was measured between the inferior T12 and superior S1 endplates (Fig.  
114 2A). This measurement was obtained in supine and standing for each participant using the mid-sagittal slice  
115 of the MR image.

116

#### 117 *Segmental IVD Measurements*

118 The measures for each of the five lumbar IVDs, L1/L2 through L5/S1, were obtained in supine and standing  
119 for each participant using the mid-sagittal slice of the MR image. The measures included the segmental  
120 Cobb angle, the anterior to posterior height (A/P) ratio, and the IVD width (Fig. 2B, 2C and 2D). The  
121 segmental Cobb angle was calculated as the angle created by the line segment containing the anterior and  
122 posterior edges of the superior endplate with the line segment containing anterior and posterior side of the  
123 inferior endplate (Fig. 2B). The heights were calculated as the distances on the superior endplate to inferior  
124 endplate distance at the anterior and posterior sides for each IVD level. The A/P ratio was calculated by  
125 dividing the anterior height by the posterior height (Fig. 2C). The IVD width was defined as the maximum  
126 distance between the anterior and posterior bulge points of an IVD in a sagittal view (Fig. 2D).

127

128 *Reproducibility, error and uncertainty*

129 The intra-observer (C.W./researcher) and inter-observer (researchers) reproducibility were indexed with  
130 the Intraclass Correlation Coefficient (ICC) using data from participants that exhibited the greatest range  
131 of values for regional and all lumbar segments (30). A written rubric based on anatomical landmarks  
132 (segmental Cobb angles, IVD widths, the anterior-, and posterior- heights) was used for all segmental  
133 measurements. The intra-observer analysis was performed using measured variables obtained on three  
134 distinct nonconsecutive days. Additional observers performed the inter-observer analysis based on the  
135 written rubric for regional and segmental measurements with three sets of measurements on non-  
136 consecutive days.

137 We quantified the error associated with image resolution and its impact on the uncertainty of IVD  
138 measurements. The resolution-based error of the MRI images was determined by moving the coordinates  
139 of each anatomical landmark in every possible direction and calculating the effect on the subsequent IVD  
140 measurements. The maximum uncertainty from resolution on the measurements using this combinatorial  
141 approach were 5.2%, 5.4%, and 1.3% for segmental Cobb angle, A/P ratio, and IVD width, respectively.

142

143 *Statistical Analyses*

144 A three-way, repeated measures analysis of variance (ANOVA) was used to test for the factors of position,  
145 sex, and lumbar level for each of the three segmental measurements (segmental Cobb angles, A/P ratios,  
146 and IVD widths). Cobb angle was analyzed using a two-way repeated measures ANOVA to test for the  
147 factors of position and sex. Interaction terms are denoted by an asterisk (\*) in Table 2 and in the results.  
148 Post-hoc comparisons were done using the Fisher's least significant difference test. Differences are  
149 significant when the associated p-value is  $\leq 0.05$ . Post-hoc power analysis was performed on significant  
150 results using G\*Power (8).

151

152

## 153 **Results**

154 All enrolled participants (n = 40) completed the supine and standing imaging sessions and were  
155 included in all analyses.

156

### 157 *Reliability of Measurements*

158 Figure 3 shows intra-observer ICC values for each measurement. The ICC values (with the 95%  
159 confidence interval in parentheses) for the segmental Cobb angle, IVD width, and the anterior and posterior  
160 height measurements were 0.90 (0.79-0.96), 0.98 (0.95-0.99), 0.89 (0.78-0.95), and 0.76 (0.58-0.89)  
161 respectively. The inter-observer ICC agreement for segmental Cobb angle, IVD width, and the anterior and  
162 posterior height measurements were 0.89 (0.79 – 0.95), 0.99 (0.98 – 1), 0.84 (0.7 – 0.93), and 0.68 (0.46 –  
163 0.85), respectively. The intra-observer ICC for Cobb angle was 0.97 (0.90 – 0.99), and the inter-observer  
164 ICC was 0.87 (0.61-0.97).

165

### 166 *Regional Lumbar Spine Alignment*

167 Position was a significant factor. The Cobb angle decreased in standing compared to supine for all  
168 participants (Fig. 4;  $p < 0.05$ ).

169

### 170 *Segmental IVD Measurements*

#### 171 Segmental Cobb Angle

172 Sex, level, and level\*position all were significant factors (Table 2). Post hoc analyses revealed that  
173 compared to supine the L5/S1 segmental Cobb angle decreased in standing (Fig. 5;  $p < 0.05$ ).

#### 174 A/P ratio

175 Sex, level, position, and level\*position were significant factors (Table 2). Compared to supine the L2/L3  
176 and L3/L4 A/P ratio increased in standing ( $p < 0.05$ ), and the L5/S1 A/P ratio decreased in standing (Fig.  
177 6;  $p < 0.05$ ).

#### 178 IVD Width



179 Sex, level, position, and level\*position were significant factors (Table 2). There were no significant  
180 differences in IVD width due to positions at lumbar levels L1/L2 to L4/L5 for all participants (Fig. 7).  
181 Although the L5/S1 IVD width in standing was statistically greater than in supine ( $p < 0.05$ ), the margin of  
182 the difference (0.48%) was below the detection threshold per our error analyses (1.3%), and thus we did  
183 not consider this difference to be meaningful.

## 184 Discussion

185 To our knowledge this is the first study to examine the segmental Cobb angle, A/P ratio and IVD width  
186 from supine to standing. In contrast to other studies that examined angular changes that included the  
187 vertebrae and the adjacent IVD (23, 46), we measured the changes between the inferior and superior  
188 vertebral endplates of individual discs (1, 17) enabling observation of IVD-specific adaptations at every  
189 lumbar level. pMRI studies on Marine populations have shown that individual IVDs adapt to external loads  
190 placed on the spine in standing (6, 37). The changes in segmental IVD measurements from supine to  
191 standing in our back-healthy group show that adaptations due to increased loading occur at multiple levels  
192 of the lumbar spine, similar to the externally loaded spine in the supine position (21). The ability of these  
193 lumbar levels to adapt may be important for the spine to distribute loads, especially when the diminished  
194 ability of individual lumbar levels to adapt to loading are concomitant with disease and degeneration (6,  
195 22). Given that the pMRI in standing improves the detection of IVD bulging (49), the lack of bulging in  
196 these participants in standing confirms that these IVDs are indeed relatively healthy (2, 41).

197 The reduced lordosis of our participants in standing is consistent with the observations of another  
198 pMRI study (27). Other studies using a pMRI have shown that lordosis is not different between supine and  
199 standing with a cushion underneath their knees (16). These results are in contrast with studies done using  
200 plain film radiography which observed more lordosis in standing (7, 23, 46). The discrepancy is likely due  
201 to a pelvic tilt that has been shown to influence lumbar lordosis in standing (24), since the pelvis is strongly  
202 correlated to lumbar lordosis in supine (7). In this study, we did not directly control for pelvic tilt by placing  
203 a pillow underneath the legs in supine. Despite this, our measured Cobb angles in standing are consistent  
204 with a prior report that also included young, asymptomatic individuals (48). Further, it has been shown  
205 that externally applied loads during standing can alter the lumbar spine to be in less lordosis in pMRI (6,  
206 36, 37). Our study did not find lordosis to be different between sexes as previously reported (15, 47).  
207 Additionally, we observed that males and females comparably change from supine to standing. Wood et al.  
208 included males and females in their study but did not specifically report on sex differences in position (46).  
209 Although we observed sex as a significant factor in the segmental measurements, there were no interactions

210 between sex and position, suggesting though both sexes adapt to standing, they do not adapt differently. In  
211 this study, the decline of the Cobb angle of the spine in standing in a young, back-healthy group with no  
212 observed translational lumbosacral anatomies or spondylolysis/spondylolisthesis is coupled with  
213 measurable changes in the IVD across the different lumbar levels (Fig. 5, 6).

214 Characterizing the IVD using measurements that are based on independent landmarks is important  
215 for capturing the nuanced changes in the structure of the IVD (12, 16, 42). Using the pMRI system, we  
216 demonstrate that it is possible to determine and reliably characterize the regional lumbar alignment and  
217 individual lumbar IVDs using the segmental measurements of segmental Cobb angle, A/P ratio, and IVD  
218 width. Moreover, the images obtained in standing can yield more physiologically relevant information than  
219 a slightly higher resolution scan taken in supine due to the differences in loading between supine and  
220 standing. Although some of the measurements made here could also be obtained from plain film  
221 radiographs (23, 25), the pMRI enables the possibility of assessing any potential involvement of IVD-  
222 specific pathologies (such as herniations) in the spinal structural measurements. The nature of MRI also  
223 leverages the increased signal of hydrated microstructures in the IVD, and the 3D reconstruction capabilities  
224 of the volumetric image stack could be utilized further for additional spatially-unbiased analyses.

225 There are several limitations to our study. First, although the field strength of this pMRI system  
226 (0.6 T) is lower than typical clinical systems (1.5 T), the higher efficiency of the field algorithm reconstructs  
227 and generates images at comparable resolutions to 1.5 T systems (13). The ICC and uncertainty analyses  
228 confirm the reliability of our measurements using the pMRI system. Our inter-observer reliability ranged  
229 from 0.68 to 0.99 and is consistent with a MRI study that reported an inter-observer ICC range of 0.73-0.95  
230 (11). Analyses of error and uncertainty in our images reveal that the resolution can affect the measurements  
231 by 1.3%-5.4%, and thus only differences that were greater than the uncertainty range were considered to be  
232 meaningful. Second, we did not directly control for the pelvic tilt which is known to influence spinal  
233 alignment, and this may have contributed to the participants' variations in the supine spinal alignment.  
234 Third, although we only enrolled 40 participants in this study, the power for our discriminating

235 measurements ranged from 0.57-0.99, indicating that the sample size is adequate for most measures. Only  
236 the L3/L4 A/P ratio was powered below 0.80 at 0.57.

237           This study is the first to examine the differences in regional and segmental measurements between  
238 supine and standing positions in young, back-healthy participants using a pMRI system. Further, we have  
239 developed and validated a method using the pMRI system to evaluate changes in spinal measurements. Our  
240 key finding here is that the individual IVD levels within a healthy spine adapt to loaded positions non-  
241 uniformly. These findings highlight the importance of acquiring images in standing as they are different  
242 than the traditional MRI images in supine. Observing IVDs in standing and comparing symptomatic and  
243 asymptomatic individuals can be more informative of IVD function and help elucidate the discordance  
244 between imaging findings and LBP.

245 **Acknowledgements**

246 The authors gratefully acknowledge Dave Magner, Travis Gould, Nicholas Woerther and the staff at The  
247 Open Upright MRI of Missouri for providing technical assistance with the imaging.

248 **Grants**

249 These studies were supported by the National Institutes of Health (P30 AR57325 - WUSTL  
250 Musculoskeletal Research Center), K01AR069116, R21AR069804, and 5T32EB018266.

251 **Disclosures**

252 The authors have no conflicts of interest.

## 253 **References**

- 254 1. **Acosta FL, Liu J, Slimack N, Moller D, Fessler R, Koski T.** Changes in coronal and sagittal plane  
255 alignment following minimally invasive direct lateral interbody fusion for the treatment of  
256 degenerative lumbar disease in adults: a radiographic study. *J Neurosurg Spine* 15: 92–96, 2011.
- 257 2. **Adams MA, Freeman BJC, Morrison HP, Nelson IW, Dolan P.** Mechanical Initiation of Intervertebral  
258 Disc Degeneration [Online]. *Spine* 25, 2000.  
259 [http://journals.lww.com/spinejournal/Fulltext/2000/07010/Mechanical\\_Initiation\\_of\\_Intervertebr](http://journals.lww.com/spinejournal/Fulltext/2000/07010/Mechanical_Initiation_of_Intervertebral_Disc.5.aspx)  
260 [al\\_Disc.5.aspx](http://journals.lww.com/spinejournal/Fulltext/2000/07010/Mechanical_Initiation_of_Intervertebral_Disc.5.aspx).
- 261 3. **Aiyangar AK, Zheng L, Tashman S, Anderst WJ, Zhang X.** Capturing Three-Dimensional In Vivo  
262 Lumbar Intervertebral Joint Kinematics Using Dynamic Stereo-X-Ray Imaging. *J Biomech Eng* 136:  
263 011004-011004–9, 2013.
- 264 4. **Alyas F, Connell D, Saifuddin A.** Upright positional MRI of the lumbar spine. *Clin Radiol* 63: 1035–  
265 1048, 2008.
- 266 5. **Baker ADL.** Abnormal Magnetic-Resonance Scans of the Lumbar Spine in Asymptomatic Subjects. A  
267 Prospective Investigation. In: *Classic Papers in Orthopaedics*, edited by Banaszkiwicz PA, Kader DF.  
268 Springer London, p. 245–247.
- 269 6. **Berry DB, Rodríguez-Soto AE, Su J, Gombatto SP, Shahidi B, Palombo L, Chung C, Jensen A, Kelly**  
270 **KR, Ward SR.** Lumbar spine postures in marines during simulated operational positions. *J. Orthop.*  
271 *Res.* ( January 1, 2017). doi: 10.1002/jor.23510.
- 272 7. **Chevillotte T, Coudert P, Cawley D, Bouloussa H, Mazas S, Boissière L, Gille O.** Influence of posture  
273 on relationships between pelvic parameters and lumbar lordosis: Comparison of the standing,  
274 seated, and supine positions. A preliminary study. *Orthop Traumatol Surg Res* 104: 565–568, 2018.
- 275 8. **Faul F, Erdfelder E, Lang A-G, Buchner A.** G\*Power 3: A flexible statistical power analysis program  
276 for the social, behavioral, and biomedical sciences. *Behav Res Methods* 39: 175–191, 2007.
- 277 9. **Gallagher KM, Callaghan JP.** Early static standing is associated with prolonged standing induced low  
278 back pain. *Hum Mov Sci* 44: 111–121, 2015.
- 279 10. **Gregory DE, Callaghan JP.** Prolonged standing as a precursor for the development of low back  
280 discomfort: An investigation of possible mechanisms. *Gait Posture* 28: 86–92, 2008.
- 281 11. **Guen YL, Joon WL, Hee SC, Kyoung-Jin O, Heung SK.** A new grading system of lumbar central canal  
282 stenosis on MRI: an easy and reliable method. *Skeletal Radiol* 40: 1033–1039, 2011.
- 283 12. **Hansen BB, Hansen P, Christensen AF, Trampedach C, Rasti Z, Bliddal H, Boesen M.** Reliability of  
284 standing weight-bearing (0.25T) MR imaging findings and positional changes in the lumbar spine.  
285 *Skeletal Radiol* 47: 25–35, 2018.
- 286 13. **Hansson L, Westesson P, Katzberg R, Tallents R, Kurita K, Holtas S, Svensson S, Eriksson L,**  
287 **Johansen C.** MR imaging of the temporomandibular joint: comparison of images of autopsy  
288 specimens made at 0.3 T and 1.5 T with anatomic cryosections. *Am J Roentgenol* 152: 1241–1244,  
289 1989.

- 290 14. **Harrison DE, Harrison DD, Cailliet R, Janik TJ, Holland B.** Radiographic analysis of lumbar lordosis:  
291 centroid, Cobb, TRALL, and Harrison posterior tangent methods. *Spine* 26: E235-242, 2001.
- 292 15. **Hay O, Dar G, Abbas J, Stein D, May H, Masharawi Y, Peled N, Hershkovitz I.** The Lumbar Lordosis  
293 in Males and Females, Revisited. *PLOS ONE* 10: e0133685, 2015.
- 294 16. **Hirasawa Y, Bashir WA, Smith FW, Magnusson ML, Pope MH, Takahashi K.** Postural Changes of the  
295 Dural Sac in the Lumbar Spines of Asymptomatic Individuals Using Positional Stand-Up Magnetic  
296 Resonance Imaging: *Spine* 32: E136–E140, 2007.
- 297 17. **Hsieh PC, Koski TR, O’Shaughnessy BA, Sugrue P, Salehi S, Ondra S, Liu JC.** Anterior lumbar  
298 interbody fusion in comparison with transforaminal lumbar interbody fusion: implications for the  
299 restoration of foraminal height, local disc angle, lumbar lordosis, and sagittal balance. *J Neurosurg*  
300 *Spine* 7: 379–386, 2007.
- 301 18. **Jinkins JR, Dworkin JS, Damadian RV.** Upright, weight-bearing, dynamic–kinetic MRI of the spine:  
302 initial results. *Eur Radiol* 15: 1815–1825, 2005.
- 303 19. **J.R. Jinkins, J.S. Dworkin, C.A. Green, J.F. Greenhalgh, M. Gianni, M. Gelbien, R.B. Wolf, J.**  
304 **Damadian, R.V. Damadian.** Upright, Weight-Bearing, Dynamic-Kinetic MRI of the Spine  
305 pMRI/kMRI. *Riv Neuroradiol* 15: 333–357, 2002.
- 306 20. **Karadimas EJ, Siddiqui M, Smith FW, Wardlaw D.** Positional MRI Changes in Supine Versus Sitting  
307 Postures in Patients With Degenerative Lumbar Spine. *Clin Spine Surg* 19: 495, 2006.
- 308 21. **Kimura S, Steinbach GC, Watenpaugh DE, Hargens AR.** Lumbar Spine Disc Height and Curvature  
309 Responses to an Axial Load Generated by a Compression Device Compatible with Magnetic  
310 Resonance Imaging. [Miscellaneous Article]. *Spine* 26: 2596–2600, 2001.
- 311 22. **Kulig K, Powers CM, Landel RF, Chen H, Fredericson M, Guillet M, Butts K.** Segmental lumbar  
312 mobility in individuals with low back pain: in vivo assessment during manual and self-imposed  
313 motion using dynamic MRI. *BMC Musculoskelet Disord* 8: 8, 2007.
- 314 23. **Lee ES, Ko CW, Suh SW, Kumar S, Kang IK, Yang JH.** The effect of age on sagittal plane profile of the  
315 lumbar spine according to standing, supine, and various sitting positions. *J Orthop Surg* 9: 11, 2014.
- 316 24. **Levine D, Whittle MW.** The Effects of Pelvic Movement on Lumbar Lordosis in the Standing Position.  
317 *J Orthop Sports Phys Ther* 24: 130–135, 1996.
- 318 25. **Lord MJ, Small JM, Dinsay JM, Watkins RG.** Lumbar lordosis: effects of sitting and standing. *Spine*  
319 22: 2571–2574, 1997.
- 320 26. **Ludescher B, Effelsberg J, Martirosian P, Steidle G, Markert B, Claussen C, Schick F.** T2- and  
321 diffusion-maps reveal diurnal changes of intervertebral disc composition: An in vivo MRI study at  
322 1.5 Tesla. *J Magn Reson Imaging* 28: 252–257, 2008.
- 323 27. **Madsen R, Jensen TS, Pope M, Sørensen JS, Bendix T.** The Effect of Body Position and Axial Load on  
324 Spinal Canal Morphology: An MRI Study of Central Spinal Stenosis. *Spine* 33: 61–67, 2008.

- 325 28. **Marshall PWM, Patel H, Callaghan JP.** Gluteus medius strength, endurance, and co-activation in the  
326 development of low back pain during prolonged standing. *Hum Mov Sci* 30: 63–73, 2011.
- 327 29. **Mauch F, Jung C, Huth J, Bauer G.** Changes in the Lumbar Spine of Athletes From Supine to the  
328 True-Standing Position in Magnetic Resonance Imaging: *Spine* 35: 1002–1007, 2010.
- 329 30. **McGraw KO, Wong SP.** Forming inferences about some intraclass correlation coefficients. *Psychol*  
330 *Methods* 1: 30–46, 1996.
- 331 31. **NACHEMSON AL.** Disc Pressure Measurements. [Online]. *Spine* 6, 1981.  
332 [http://journals.lww.com/spinejournal/Fulltext/1981/01000/Disc\\_Pressure\\_Measurements\\_.20.aspx](http://journals.lww.com/spinejournal/Fulltext/1981/01000/Disc_Pressure_Measurements_.20.aspx)  
333 x.
- 334 32. **Naserkhaki S, Jaremko JL, Adeeb S, El-Rich M.** On the load-sharing along the ligamentous  
335 lumbosacral spine in flexed and extended postures: Finite element study. *J Biomech* 49: 974–982,  
336 2016.
- 337 33. **Nelson-Wong E, Callaghan JP.** Transient Low Back Pain Development During Standing Predicts  
338 Future Clinical Low Back Pain in Previously Asymptomatic Individuals. *Spine* 39: E379, 2014.
- 339 34. **Nelson-Wong E, Gregory DE, Winter DA, Callaghan JP.** Gluteus medius muscle activation patterns  
340 as a predictor of low back pain during standing. *Clin Biomech* 23: 545–553, 2008.
- 341 35. **Rea W, Kapur S, Mutagi H.** Intervertebral disc as a source of pain. *Contin Educ Anaesth Crit Care*  
342 *Pain* 12: 279–282, 2012.
- 343 36. **Rodríguez-Soto AE, Berry DB, Palombo L, Valaik E, Kelly KR, Ward SR.** Effect of Load Magnitude and  
344 Distribution on Lumbar Spine Posture in Active-duty Marines: *SPINE* 42: 345–351, 2017.
- 345 37. **Rodríguez-Soto AE, Jaworski R, Jensen A, Niederberger B, Hargens AR, Frank LR, Kelly KR, Ward**  
346 **SR.** Effect of Load Carriage on Lumbar Spine Kinematics: *Spine* 38: E783–E791, 2013.
- 347 38. **Rosset A, Spadola L, Ratib O.** OsiriX: An Open-Source Software for Navigating in Multidimensional  
348 DICOM Images. *J Digit Imaging* 17: 205–216, 2004.
- 349 39. **de Schepper EIT, Damen J, van Meurs JBJ, Ginai AZ, Popham M, Hofman A, Koes BW, Bierma-**  
350 **Zeinstra SM.** The Association Between Lumbar Disc Degeneration and Low Back Pain: The  
351 Influence of Age, Gender, and Individual Radiographic Features. *Spine* 35: 531–536, 2010.
- 352 40. **Sorensen CJ, Norton BJ, Callaghan JP, Hwang C-T, Van Dillen LR.** Is lumbar lordosis related to low  
353 back pain development during prolonged standing? *Man Ther* 20: 553–557, 2015.
- 354 41. **Stefanakis M, Luo J, Pollintine P, Dolan P, Adams MA.** ISSLS Prize Winner: Mechanical Influences in  
355 Progressive Intervertebral Disc Degeneration. *Spine* 39: 1365–1372, 2014.
- 356 42. **Tarantino U, Fanucci E, Iundusi R, Celi M, Altobelli S, Gasbarra E, Simonetti G, Manenti G.** Lumbar  
357 spine MRI in upright position for diagnosing acute and chronic low back pain: statistical analysis of  
358 morphological changes. *J Orthop Traumatol* 14: 15–22, 2013.



- 359 43. **Wang S, Xia Q, Passias P, Wood K, Li G.** Measurement of geometric deformation of lumbar  
360 intervertebral discs under in-vivo weightbearing condition. *J Biomech* 42: 705–711, 2009.
- 361 44. **Wessberg P, Danielson BI, Willén J.** Comparison of Cobb Angles in Idiopathic Scoliosis on Standing  
362 Radiographs and Supine Axially Loaded MRI: *Spine* 31: 3039–3044, 2006.
- 363 45. **Wilke H-J, Rohlmann F, Neidlinger-Wilke C, Werner K, Claes L, Kettler A.** Validity and interobserver  
364 agreement of a new radiographic grading system for intervertebral disc degeneration: Part I.  
365 Lumbar spine. *Eur Spine J* 15: 720–730, 2006.
- 366 46. **Wood KB, Kos P, Schendel M, Persson K.** Effect of Patient Position on the Sagittal-Plane Profile of  
367 the Thoracolumbar Spine. *J Spinal Disord* 9: 165–169, 1996.
- 368 47. **Youdas JW, Garrett TR, Harmsen S, Suman VJ, Carey JR.** Lumbar lordosis and pelvic inclination of  
369 asymptomatic adults. *Phys Ther* 76: 1066–1081, 1996.
- 370 48. **Yukawa Y, Kato F, Suda K, Yamagata M, Ueta T, Yoshida M.** Normative data for parameters of  
371 sagittal spinal alignment in healthy subjects: an analysis of gender specific differences and changes  
372 with aging in 626 asymptomatic individuals. *Eur Spine J* 27: 426–432, 2018.
- 373 49. **Zou J, Yang H, Miyazaki M, Wei F, Hong SW, Yoon SH, Morishita Y, Wang JC.** Missed Lumbar Disc  
374 Herniations Diagnosed With Kinetic Magnetic Resonance Imaging. *Spine* 33: E140, 2008.
- 375

376 Table 1: Characteristics of the participants presented as the mean  $\pm$  standard deviation. Age ( $p = 0.81$ ) and  
377 BMI ( $p = 0.35$ ) are not statistically significant between sexes.

|                          | <b>Male (19)</b> | <b>Female (21)</b> |
|--------------------------|------------------|--------------------|
| Age (y)                  | 24.7 $\pm$ 3.5   | 24.9 $\pm$ 2.1     |
| Height (cm)              | 179.2 $\pm$ 7.4  | 164.6 $\pm$ 7.8    |
| Weight (kg)              | 73.3 $\pm$ 9.0   | 60.4 $\pm$ 5.2     |
| BMI (kg/m <sup>2</sup> ) | 23.0 $\pm$ 2.4   | 22.3 $\pm$ 1.9     |

378

379

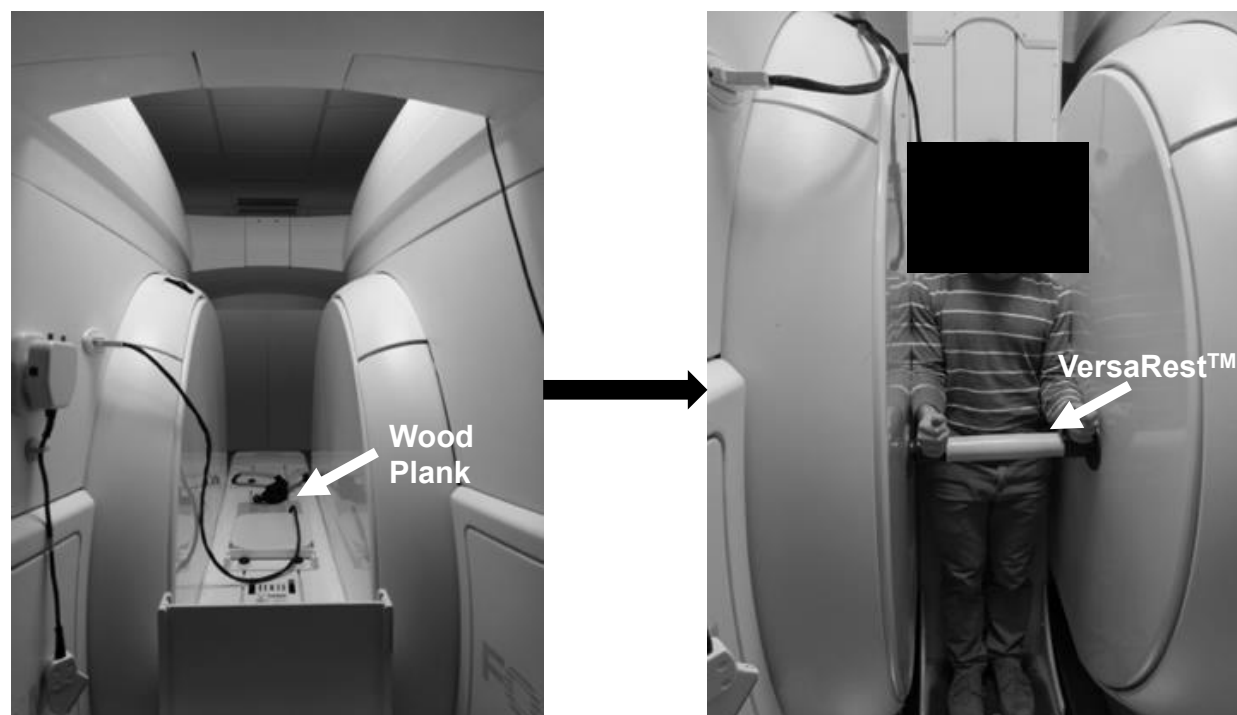

380  
381  
382  
383  
384  
385

Figure 1: The pMRI with the table in supine (left) and standing (right) configurations. A wood plank placed behind the participant to provide a continuous flat surface for the lumbar spine and is indicated by the white arrow in the left panel. A VersaRest™ device to support the arms is indicated by the white arrow in the right panel of the figure.

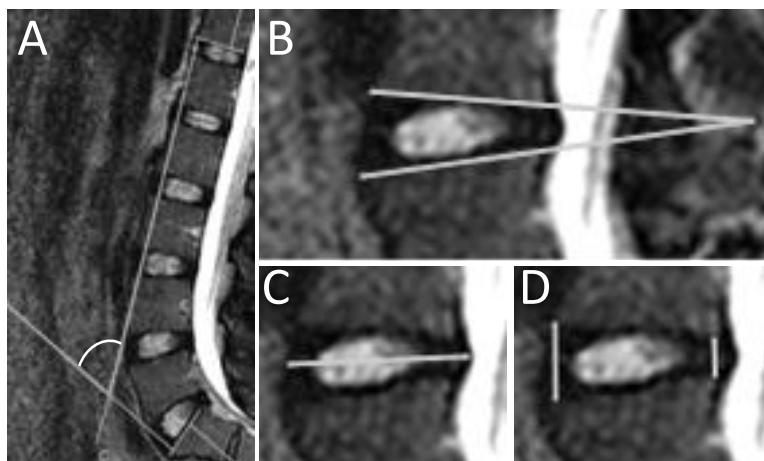

386  
387 Figure 2: A representative image of the measurements in this study: A) The four-line Cobb angle, with the  
388 white arc indicating the angle of measurement, quantifies the regional spinal alignment. Larger Cobb angles  
389 reflect more lumbar lordosis. B) The segmental Cobb angle describes the “wedging” of the IVD. C) The  
390 anterior to posterior height (A/P) ratio quantifies the relative change of shape of the IVD. D) The IVD  
391 width quantifies the radial bulging that occurs in the IVD. All images are aligned in the same orientation  
392 with the left being the anterior side.

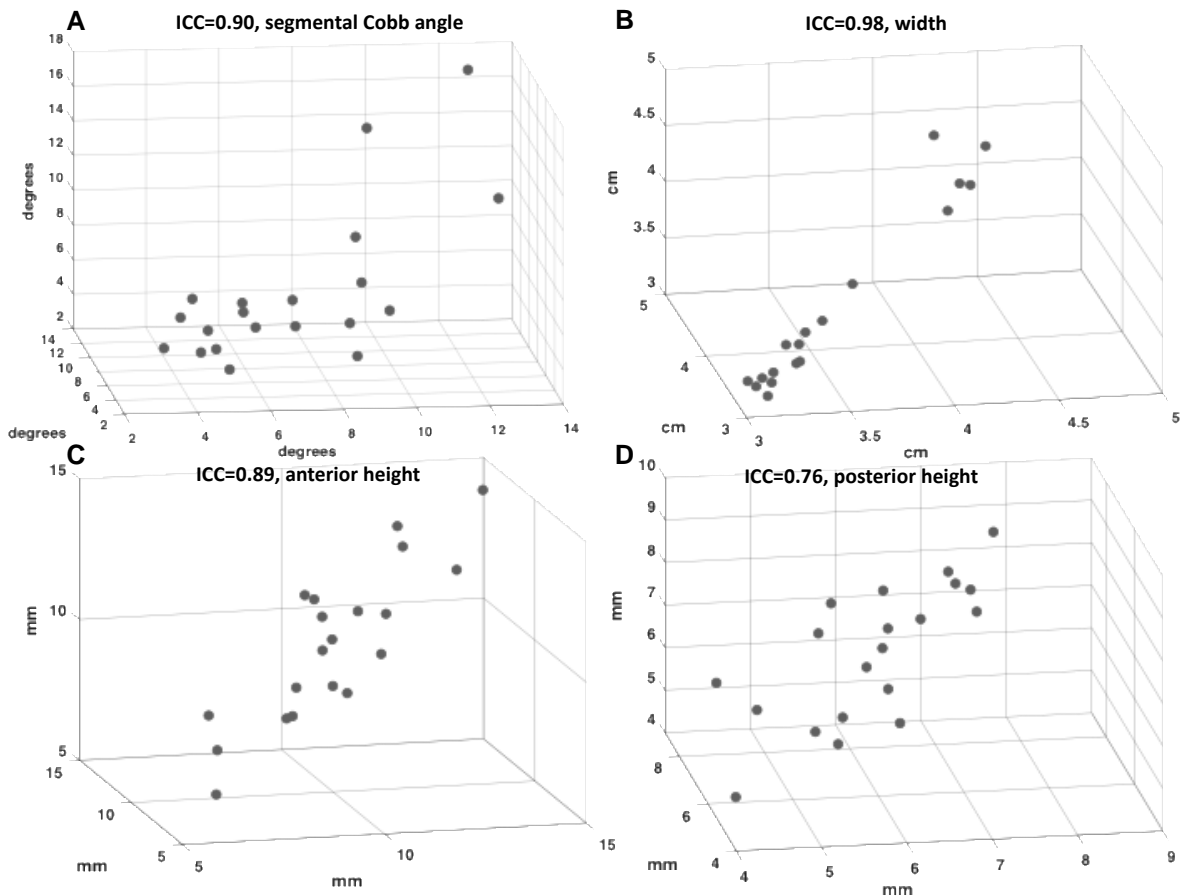

393  
394 Figure 3: The intra-observer ICC values are shown for each measurement for individual IVD levels for A)  
395 segmental Cobb angle, B) IVD width, C) anterior height, and D) posterior height. Each axis represents an  
396 independent observer trial for the measurement. A written rubric for measurement based on anatomical  
397 landmarks (segmental Cobb angle, IVD width, the anterior-, and posterior- heights) was used. The intra-  
398 observer analysis was performed using measured variables obtained on three different nonconsecutive days.

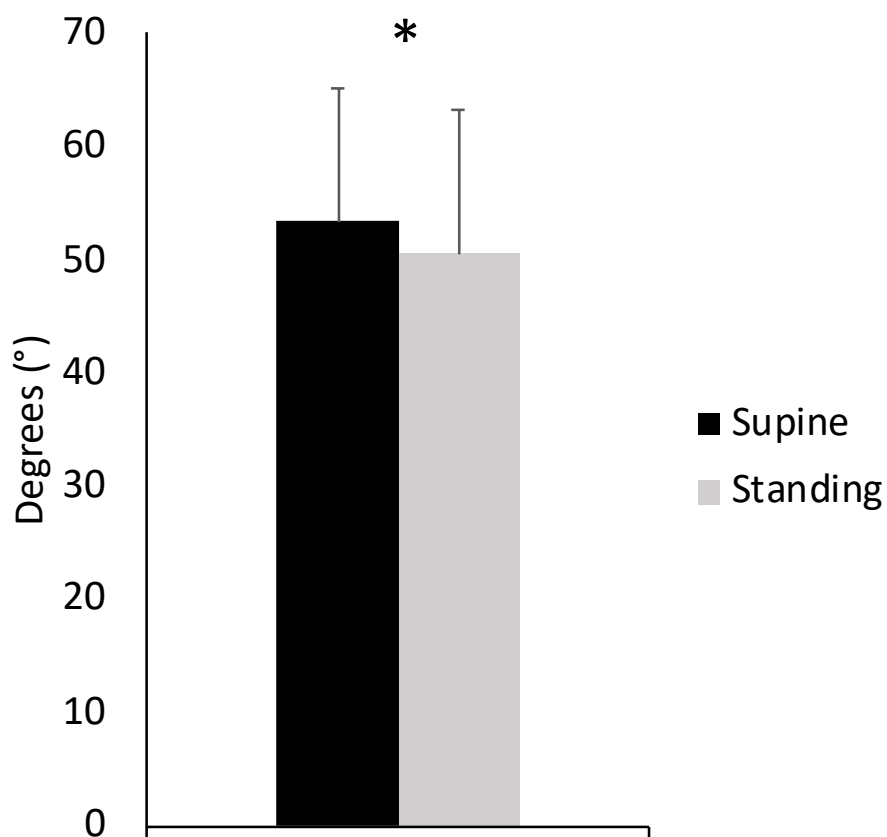

399 Figure 4: The Cobb angle for all participants in each position show that lordosis decreases in standing (\*  
400 :two-way repeated measures ANOVA,  $p < 0.05$ ). Error bars indicate standard deviations.  
401

402 Table 2: P-values for the three-way repeated measures ANOVA examining the effects of sex, level, and  
403 position and their interactions on the segmental Cobb angle, A/P ratio, and IVD width measurements.

| <b>Factors</b>     | <b><i>p</i>-value</b>       |                  |                  |
|--------------------|-----------------------------|------------------|------------------|
|                    | <b>Segmental Cobb angle</b> | <b>A/P ratio</b> | <b>IVD width</b> |
| Sex                | 0.027                       | < 0.001          | < 0.001          |
| Level              | 0.004                       | < 0.001          | < 0.001          |
| Position           | ---                         | < 0.001          | < 0.001          |
| Sex*Level          | ---                         | ---              | ---              |
| Sex*Position       | ---                         | ---              | ---              |
| Level*Position     | < 0.001                     | < 0.001          | < 0.001          |
| Sex*Level*Position | ---                         | ---              | ---              |

404

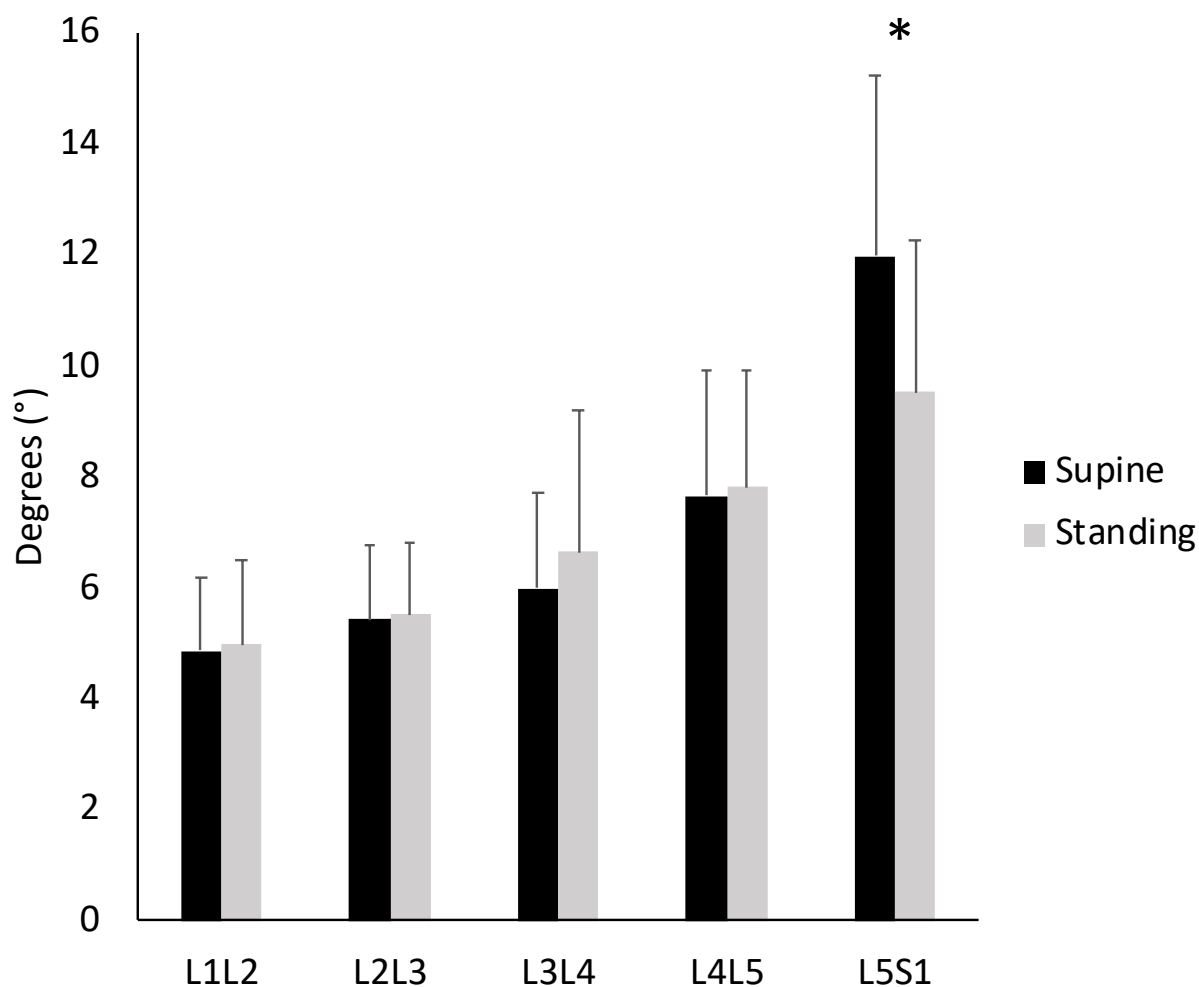

405  
406 Figure 5: The mean segmental Cobb angles at each lumbar level for all participants in supine and in  
407 standing. The segmental Cobb angle decreased at L5/S1 in standing (\* :three-way repeated measures  
408 ANOVA,  $p < 0.05$ ). Error bars indicate standard deviations.



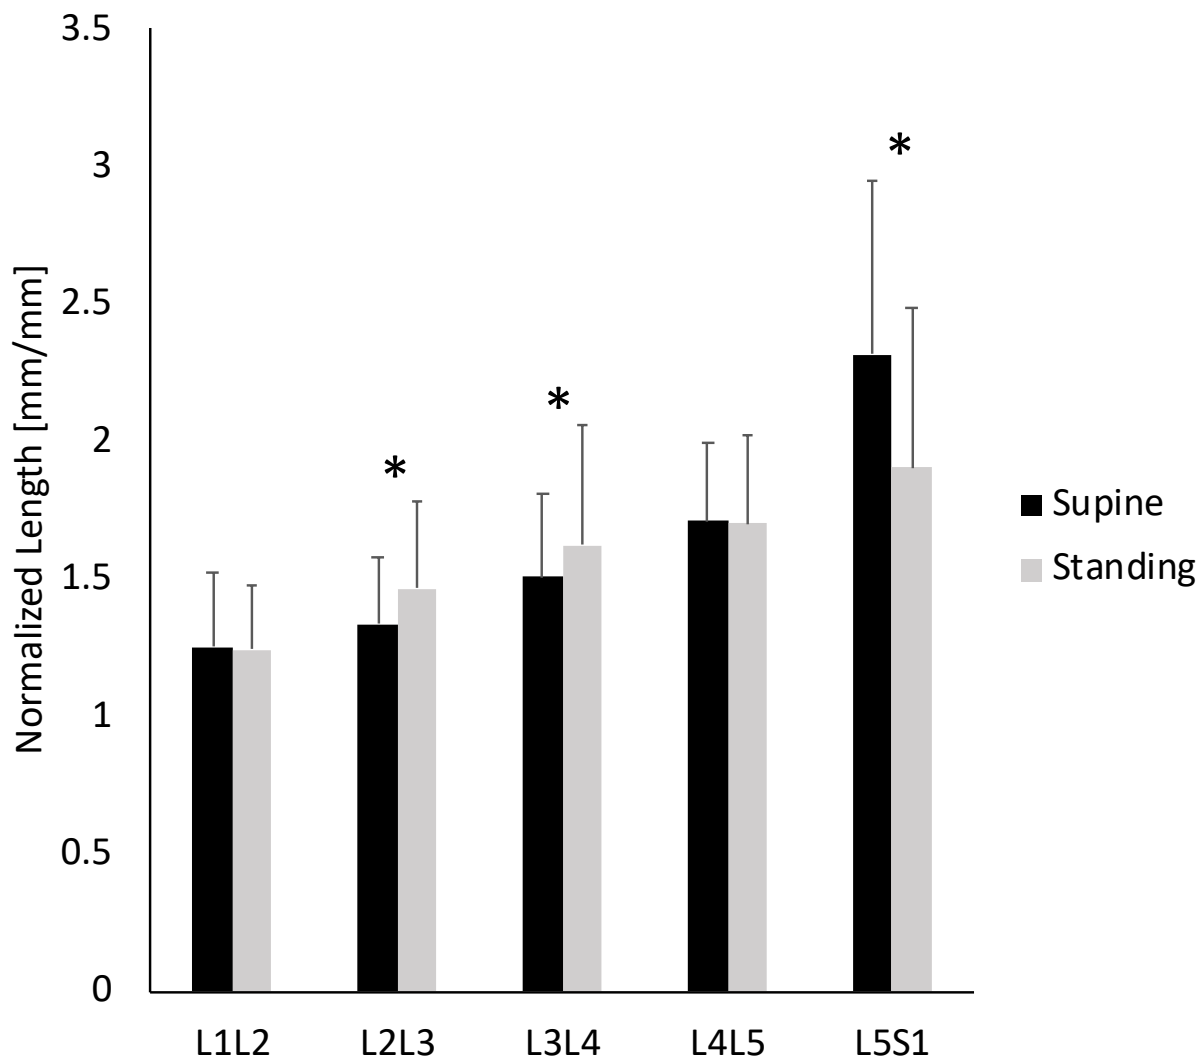

409  
410 Figure 6: The A/P ratios show that L2/L3 and L3/L4 increases in standing, and decreased in the L5/S1.  
411 (\*: three-way repeated measures ANOVA,  $p < 0.05$ ). Error bars indicate standard deviations.

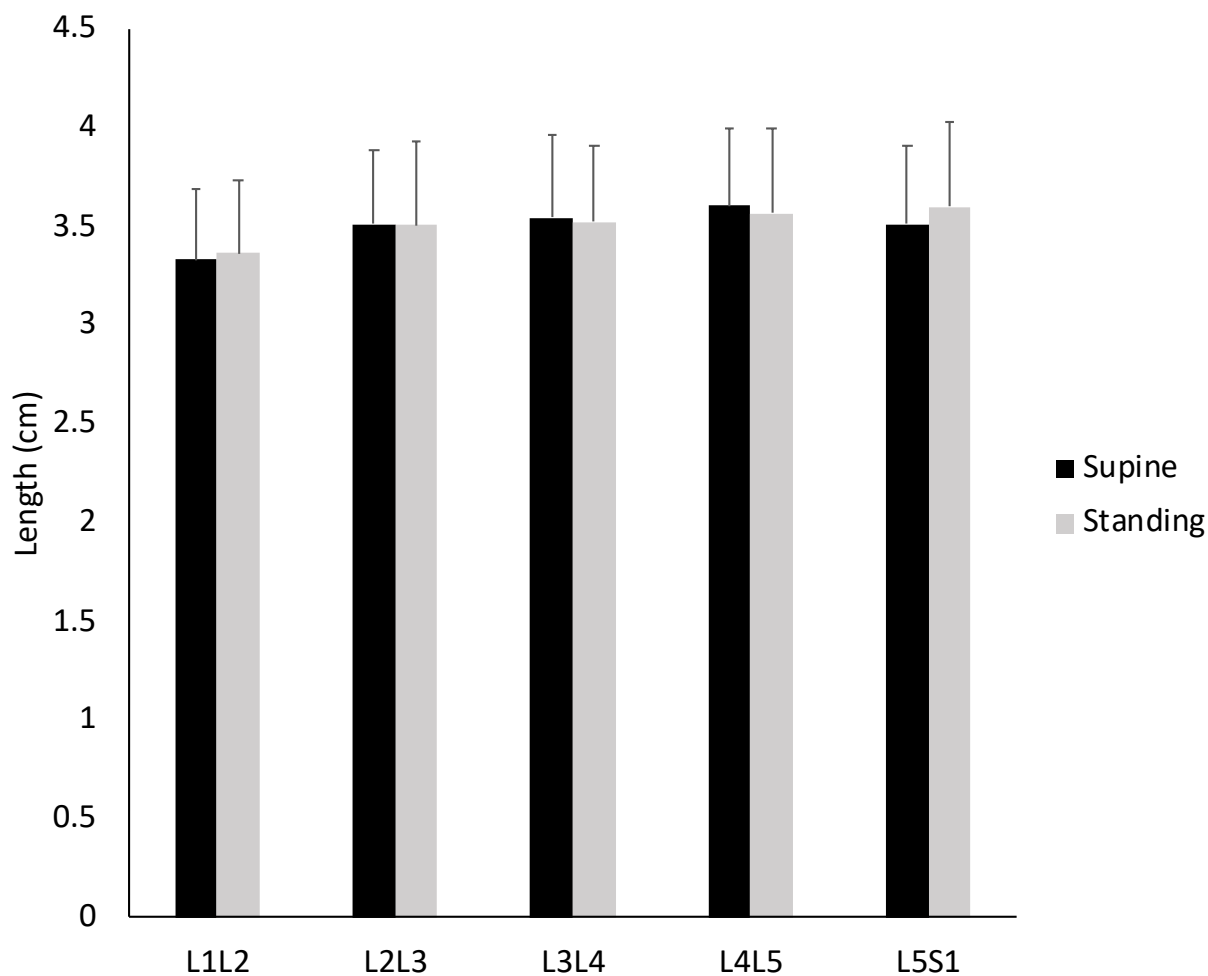

412  
413 Figure 7: The IVD width shows no differences at all levels between supine and standing positions across  
414 participants. Error bars indicate positive standard deviations.
